# Supplementary material
Source: PubMed Central journal article supplement (PMC2872219)
Supplement: mmc1.pdf [file mmc1.pdf]

Biophysical Journal, Volume 98

**Supporting Material**

**Dynamics of bacterial swarming**

Nicholas C. Darnton, Linda C. Turner, Svetlana Rojevsky, and Howard C. Berg

Speed distribution broken down by cell length

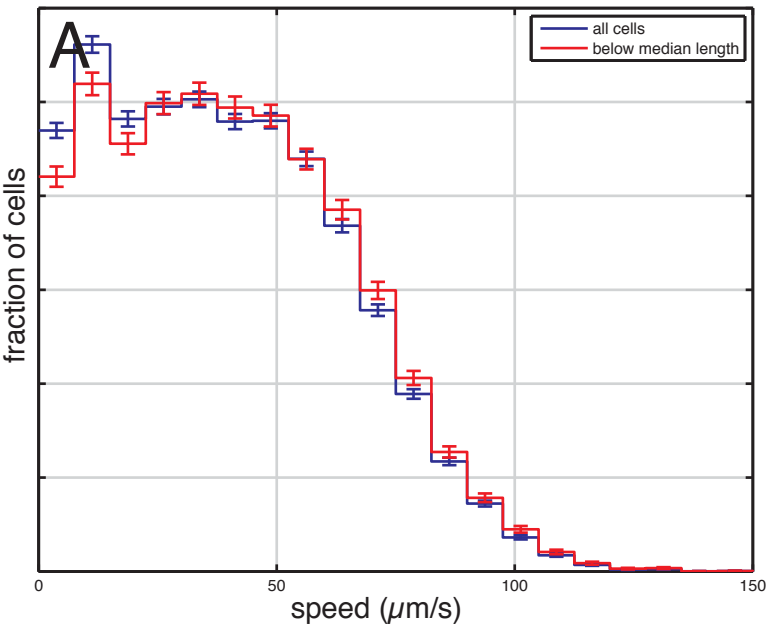

Propulsion angle distribution broken down by cell length

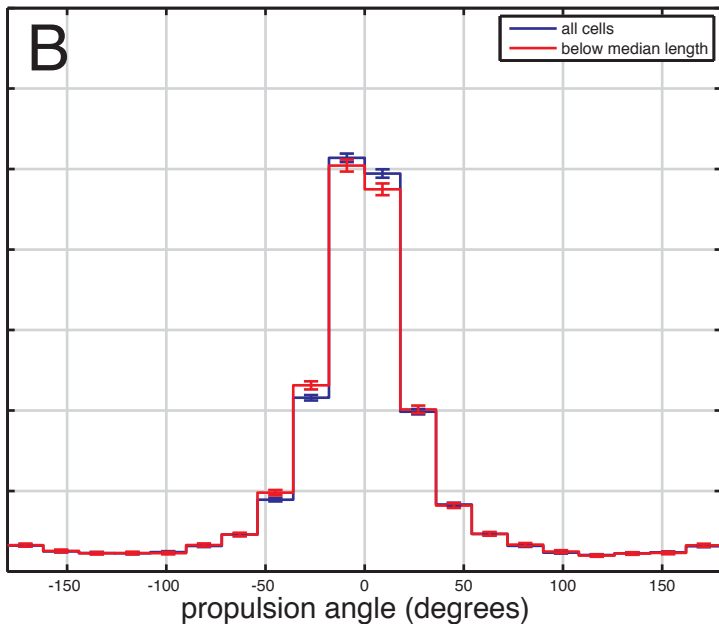

Propulsion angle distribution broken down by cell speed

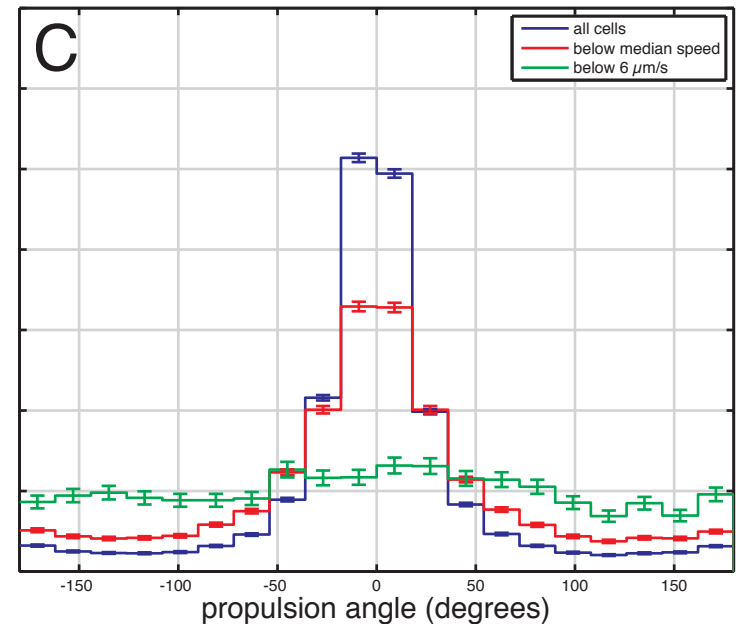

Distributions of cell speed (A) and cell propulsion angle (the angle between the cell body and its velocity vector; B and C), for cells of normal and below normal length (less than  $4.9 \mu\text{m}$ ; A and B) and for cells of normal, below normal (less than  $38 \mu\text{m/s}$ ) and very slow speeds (C). The propulsion angle distribution changes with cell speed, but all other distributions are independent of each other. The propulsion angle distribution is flat for slowly moving cells (less than  $6 \mu\text{m/s}$ ).
